# Supplementary material
Source: MDPI journal article supplement (https://www.mdpi.com/2313-0105/7/4/69)
Supplement: s1 [file s1]

## Supporting Information

# High-Performance Amorphous Carbon Coated $\text{LiNi}_{0.6}\text{Mn}_{0.2}\text{Co}_{0.2}\text{O}_2$ Cathode Material with Improved Capacity Retention for Lithium-Ion Batteries

Anish Raj Kathribail<sup>1,3,\*</sup>, Arlavinda Rezqita<sup>1</sup>, Daniel Lager<sup>2</sup>, Raad Hamid<sup>1</sup>, Yuri Surace<sup>1</sup>, Maitane Bercibar<sup>3</sup>, Joeri Van Mierlo<sup>3</sup>, Annick Hubin<sup>4</sup>, Marcus Jahn<sup>1</sup> and Jürgen Kahr<sup>1</sup>

- 1 Center for Low-Emission Transport, AIT Austrian Institute of Technology GmbH, Giefinggasse 2, 1210 Vienna, Austria.  
2 Sustainable Thermal Energy Systems, AIT Austrian Institute of Technology GmbH, Giefinggasse 2, 1210 Vienna, Austria.  
3 Department of Electrical Engineering and Energy Technology (ETEC), Vrije Universiteit Brussel, 1050 Brussels, Belgium.  
4 Department of Electrochemical and Surface Engineering (SURF), Vrije Universiteit Brussel, 1050 Brussels, Belgium.  
\* Correspondence: anish.raj.kathribail@vub.be (A.R.K); Tel.: +32471545381 juergen.kahr@ait.ac.at (J.K); Tel.: +4366488256003

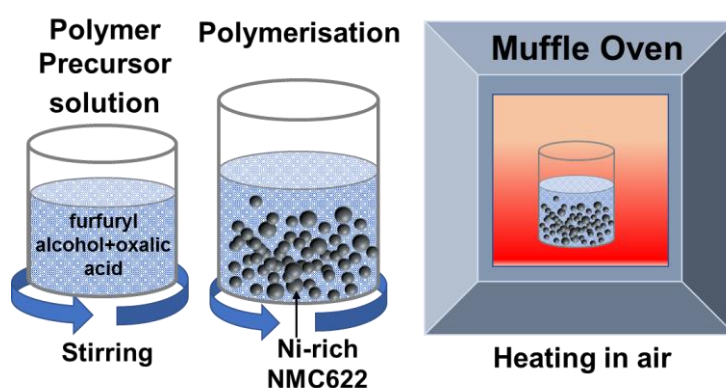

Figure S 1: Schematic of synthesis process.

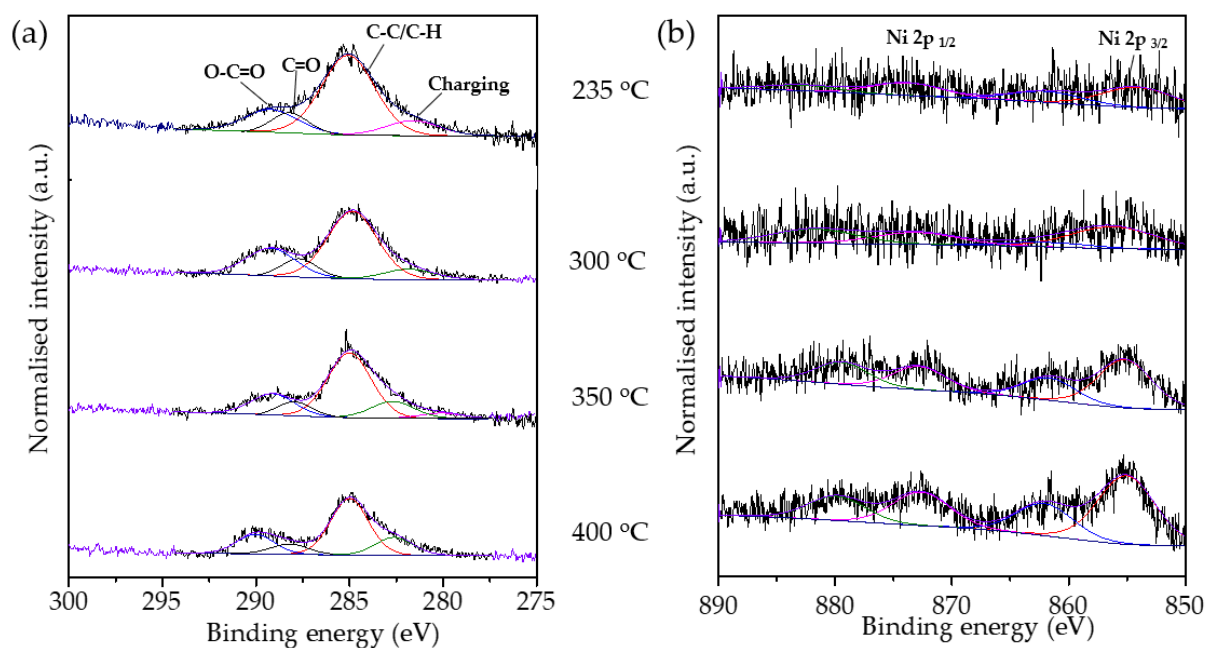

Figure S 2: XPS detail spectra for (a) C 1s and (b) Ni 2p regions.

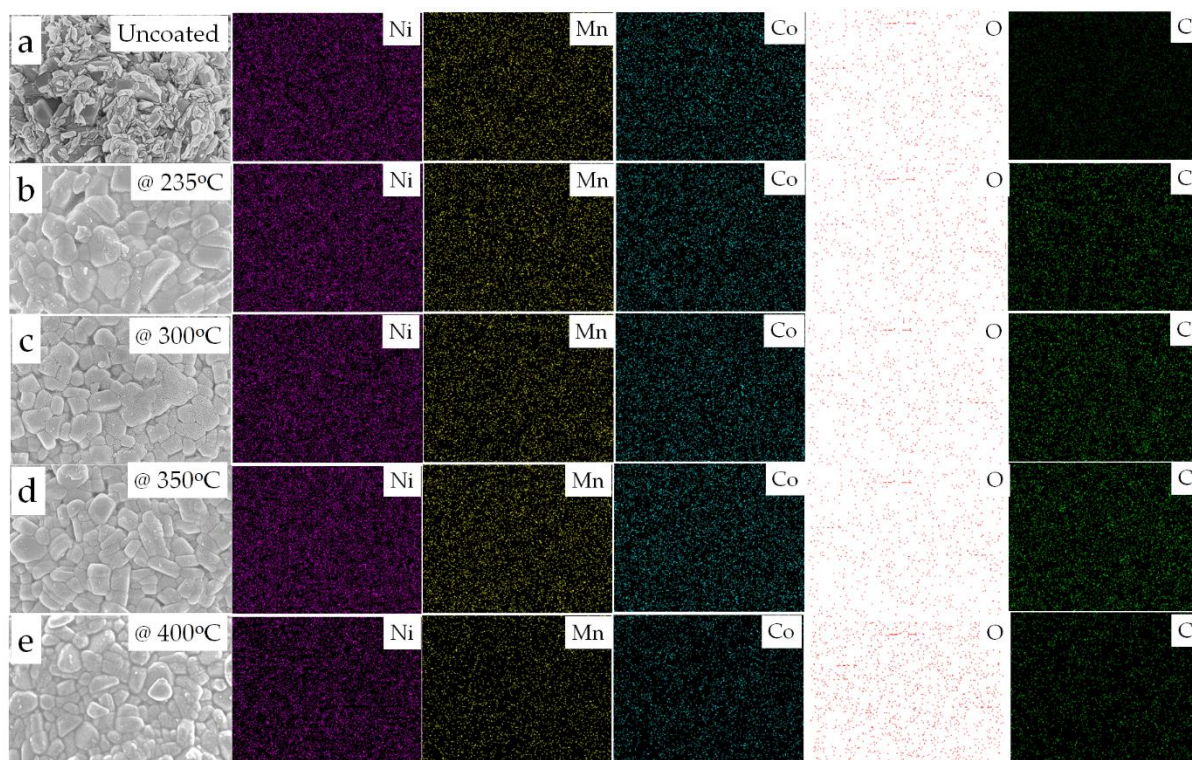

Figure S 3: EDAX analysis of (a) Uncoated pristine NMC622, (b) Coated calcined at 235 °C, (c) Coated calcined at 300 °C, (d) Coated calcined at 350 °C, (e) Coated calcined at 400 °C.

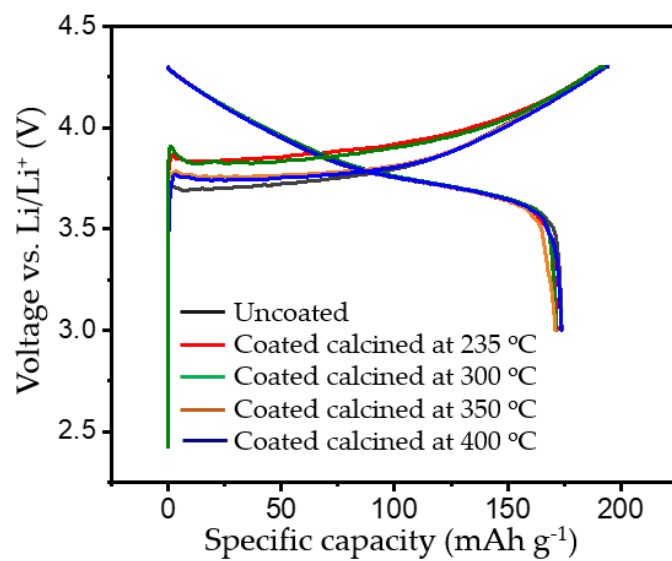

Figure S 4: Formation cycle profile of uncoated and coated calcined NMC622 sample carried at 0.1C current rate.

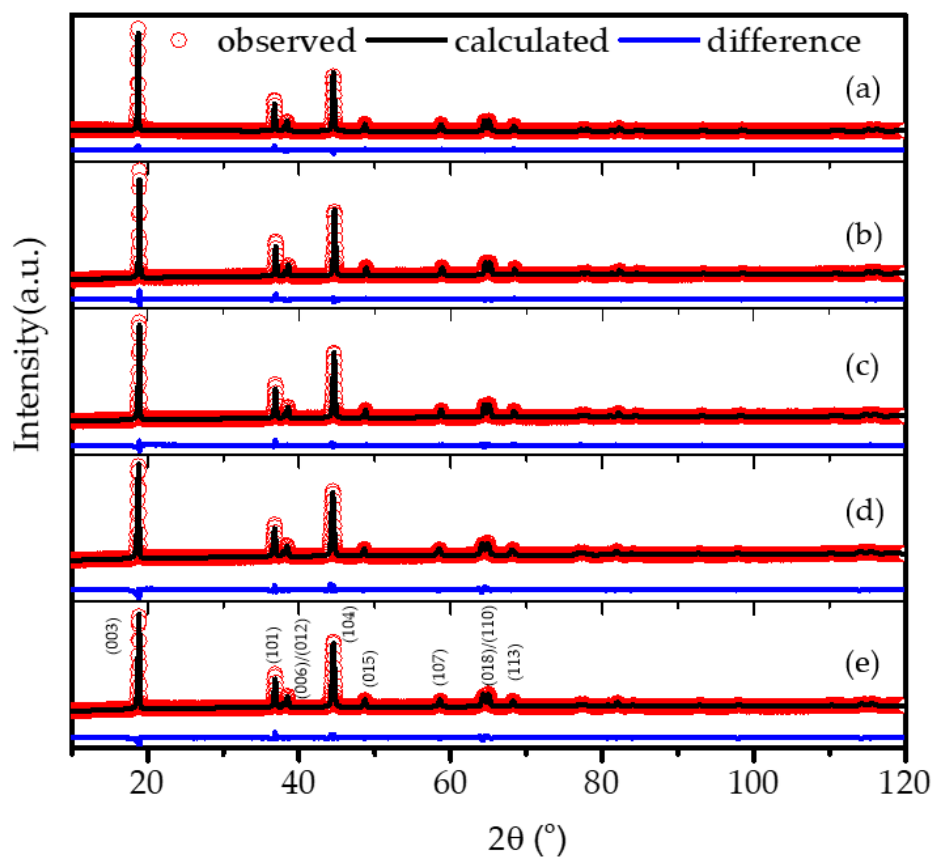

Figure S 5: XRD patterns of (a) Uncoated pristine NMC622, (b) Uncoated calcined at 235 °C, (c) Uncoated calcined at 300 °C, (d) Uncoated calcined at 350 °C, (e) Uncoated calcined at 400 °C.

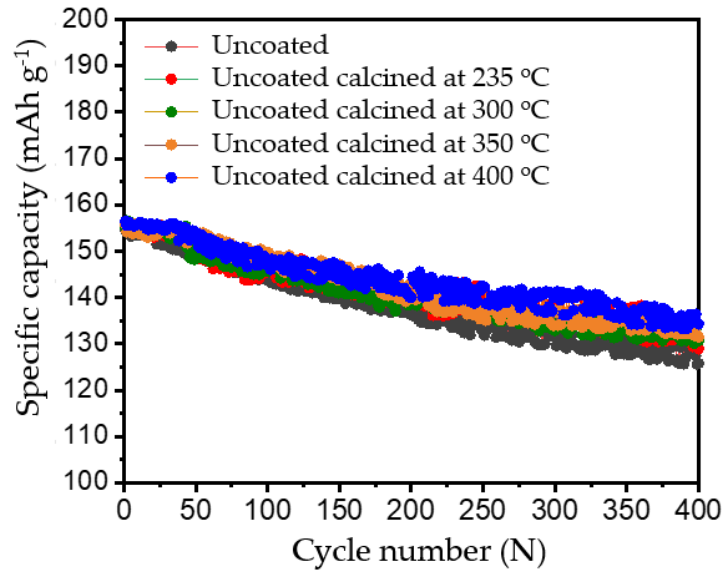

Figure S 6: Cycling performance of the uncoated pristine NMC622 and uncoated calcined at 235 °C, 300 °C, 350 °C and 400 °C.

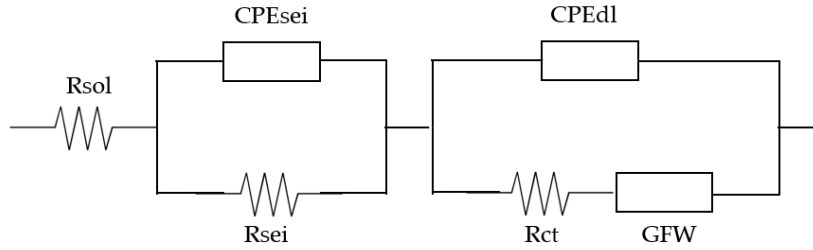

Figure S 7: Equivalent electrical circuit for the impedance analysis of the uncoated and coated samples.

Table S 1: The lattice parameters of uncoated pristine and the uncoated heated NMC622 samples.

| Sample/<br>Calcination<br>temperature | a         | c          | c/a  | I(003)/I(104) | Rwp  | Goodness-<br>of-fit ( $\chi^2$ ) |
|---------------------------------------|-----------|------------|------|---------------|------|----------------------------------|
| (°C)                                  | (Å)       | (Å)        |      |               |      |                                  |
| Uncoated pristine                     | 2.8681(4) | 14.2230(7) | 4.95 | 1.62          | 0.99 | 2.04                             |
| Uncoated calcined<br>at 235°C         | 2.8680(3) | 14.2241(5) | 4.95 | 1.61          | 0.95 | 1.91                             |
| Uncoated calcined<br>at 300°C         | 2.8679(7) | 14.2244(2) | 4.95 | 1.62          | 0.97 | 1.96                             |
| Uncoated calcined<br>at 350°C         | 2.8673(4) | 14.2174(8) | 4.95 | 1.61          | 0.96 | 1.91                             |
| Uncoated calcined<br>at 400°C         | 2.8680(2) | 14.2223(5) | 4.95 | 1.62          | 0.97 | 1.93                             |

Table S 2: Comparison of previously reported different surface coating material to improve their long-term electrochemical cycling performance.

| Coating material                     | Cathode material                                                          | Voltage window   | Current rate | Capacity retention without coating (%) | Capacity retention with surface coating (%) | No. of cycles |
|--------------------------------------|---------------------------------------------------------------------------|------------------|--------------|----------------------------------------|---------------------------------------------|---------------|
| TiO <sub>2</sub> [1]                 | LiNi <sub>0.6</sub> Mn <sub>0.2</sub> Co <sub>0.2</sub> O <sub>2</sub>    | 2.5-4.3 V        | 1C           | 67.5                                   | 85.9                                        | 100           |
| Nitrogen-doped carbon[2]             | LiNi <sub>0.6</sub> Mn <sub>0.2</sub> Co <sub>0.2</sub> O <sub>2</sub>    | 3.0-4.5 V        | 1C           | 76.4                                   | 92.0                                        | 100           |
| SiO <sub>2</sub> [3]                 | LiNi <sub>0.6</sub> Mn <sub>0.2</sub> Co <sub>0.2</sub> O <sub>2</sub>    | 3.0-4.3 V        | 2C           | 74.0                                   | 80.0                                        | 700           |
| Al <sub>2</sub> O <sub>3</sub> [4]   | LiNi <sub>0.5</sub> Mn <sub>0.3</sub> Co <sub>0.2</sub> O <sub>2</sub>    | 3.0-4.3 V        | 1C           | 70.0                                   | 90.0                                        | 180           |
| Polypyrrole[5]                       | LiNi <sub>0.8</sub> OCo <sub>0.15</sub> Al <sub>0.05</sub> O <sub>2</sub> | 2.75-4.3 V       | 1C           | 71.6                                   | 88.9                                        | 100           |
| ZrO <sub>2</sub> [6]                 | LiNi <sub>0.6</sub> Mn <sub>0.2</sub> Co <sub>0.2</sub> O <sub>2</sub>    | 2.8-4.5 V        | 1C           | 82.7                                   | 93.8                                        | 150           |
| Al <sub>2</sub> O <sub>3</sub> [7]   | LiNi <sub>0.7</sub> Mn <sub>0.15</sub> Co <sub>0.15</sub> O <sub>2</sub>  | 3.0-4.3 V        | 0.5C         | 67.0                                   | 92.0                                        | 100           |
| Li <sub>2</sub> SiO <sub>3</sub> [8] | LiNi <sub>0.6</sub> Mn <sub>0.2</sub> Co <sub>0.2</sub> O <sub>2</sub>    | 2.8-4.6 V        | 1C           | 61.5                                   | 73.6                                        | 100           |
| Li <sub>3</sub> PO <sub>4</sub> [9]  | LiNi <sub>0.6</sub> Mn <sub>0.2</sub> Co <sub>0.2</sub> O <sub>2</sub>    | 2.7-4.5 V        | 2C           | 59.4                                   | 82.8                                        | 200           |
| WO <sub>3</sub> membrane[10]         | LiNi <sub>0.6</sub> Mn <sub>0.2</sub> Co <sub>0.2</sub> O <sub>2</sub>    | 2.8-4.3 V        | 1C           | 75.0                                   | 84.9                                        | 200           |
| Prussian blue[11]                    | LiNi <sub>0.6</sub> Mn <sub>0.2</sub> Co <sub>0.2</sub> O <sub>2</sub>    | 2.8-4.3 V        | 1C           | 83.5                                   | 89.0                                        | 350           |
| <b>Amorphous carbon (This work)</b>  | <b>LiNi<sub>0.6</sub>Mn<sub>0.2</sub>Co<sub>0.2</sub>O<sub>2</sub></b>    | <b>3.0-4.3 V</b> | <b>2C</b>    | <b>81.3</b>                            | <b>89.4</b>                                 | <b>400</b>    |

Table S 3: Comparison of previously reported different surface coating material to improve their high current electrochemical performances.

| Coating material                   | Cathode material                                                          | Voltage window | Highest discharge current rate | Discharge capacity without coating (mAh g <sup>-1</sup> ) | Discharge capacity with surface coating (mAh g <sup>-1</sup> ) | Capacity improvement (%) |
|------------------------------------|---------------------------------------------------------------------------|----------------|--------------------------------|-----------------------------------------------------------|----------------------------------------------------------------|--------------------------|
| Reduced Graphene Oxide[12]         | LiNi <sub>0.6</sub> Mn <sub>0.2</sub> Co <sub>0.2</sub> O <sub>2</sub>    | 3.0-4.5 V      | 10C                            | 104.9                                                     | 132.6                                                          | 26.4                     |
| Nitrogen-doped carbon[2]           | LiNi <sub>0.6</sub> Mn <sub>0.2</sub> Co <sub>0.2</sub> O <sub>2</sub>    | 3.0-4.5 V      | 5C                             | 130.0                                                     | 156.0                                                          | 20.0                     |
| Prussian blue[11]                  | LiNi <sub>0.6</sub> Mn <sub>0.2</sub> Co <sub>0.2</sub> O <sub>2</sub>    | 2.8-4.3 V      | 5C                             | 129.0                                                     | 133.9                                                          | 3.8                      |
| Al <sub>2</sub> O <sub>3</sub> [4] | LiNi <sub>0.5</sub> Mn <sub>0.3</sub> Co <sub>0.2</sub> O <sub>2</sub>    | 3.0-4.3 V      | 10C                            | 30.0                                                      | 45.0                                                           | 50.0                     |
| Polypyrrole[5]                     | LiNi <sub>0.8</sub> OCo <sub>0.15</sub> Al <sub>0.05</sub> O <sub>2</sub> | 2.75-4.3 V     | 5C                             | 146.2                                                     | 163.5                                                          | 11.8                     |

|                                                      |                                                                          |                  |            |             |             |             |
|------------------------------------------------------|--------------------------------------------------------------------------|------------------|------------|-------------|-------------|-------------|
| ZrO <sub>2</sub> [6]                                 | LiNi <sub>0.6</sub> Mn <sub>0.2</sub> Co <sub>0.2</sub> O <sub>2</sub>   | 2.8-4.5 V        | 5C         | 120.0       | 140.0       | 16.7        |
| Al <sub>2</sub> O <sub>3</sub> [7]                   | LiNi <sub>0.7</sub> Mn <sub>0.15</sub> Co <sub>0.15</sub> O <sub>2</sub> | 3.0-4.3 V        | 4C         | 90.0        | 134.0       | 48.9        |
| SiO <sub>2</sub> [13]                                | LiNi <sub>0.6</sub> Mn <sub>0.2</sub> Co <sub>0.2</sub> O <sub>2</sub>   | 3.0-4.3 V        | 8C         | 138.0       | 157.0       | 13.8        |
| Li <sub>4</sub> Ti <sub>5</sub> O <sub>12</sub> [14] | LiNi <sub>0.6</sub> Mn <sub>0.2</sub> Co <sub>0.2</sub> O <sub>2</sub>   | 2.7-4.3 V        | 10C        | 59.1        | 106.4       | 80.0        |
| Li <sub>3</sub> PO <sub>4</sub> [9]                  | LiNi <sub>0.6</sub> Mn <sub>0.2</sub> Co <sub>0.2</sub> O <sub>2</sub>   | 2.7-4.5 V        | 10C        | 82.7        | 126.6       | 53.1        |
| rGO@TiO <sub>2</sub> [15]                            | LiNi <sub>0.6</sub> Mn <sub>0.2</sub> Co <sub>0.2</sub> O <sub>2</sub>   | 3.0-4.5 V        | 10C        | 137.3       | 156.5       | 14.0        |
| TiO <sub>2</sub> [1]                                 | LiNi <sub>0.6</sub> Mn <sub>0.2</sub> Co <sub>0.2</sub> O <sub>2</sub>   | 2.5-4.3 V        | 10C        | 84.0        | 95.0        | 13.1        |
| Li <sub>2</sub> SiO <sub>3</sub> [8]                 | LiNi <sub>0.6</sub> Mn <sub>0.2</sub> Co <sub>0.2</sub> O <sub>2</sub>   | 2.8-4.6 V        | 10C        | 110.0       | 159.0       | 44.5        |
| <b>Amorphous carbon (This work)</b>                  | <b>LiNi<sub>0.6</sub>Mn<sub>0.2</sub>Co<sub>0.2</sub>O<sub>2</sub></b>   | <b>3.0-4.3 V</b> | <b>10C</b> | <b>63.4</b> | <b>94.7</b> | <b>49.4</b> |

#### References:

1. Qin, C.; Cao, J.; Chen, J.; Dai, G.; Wu, T.; Chen, Y.; Tang, Y.; Li, A.; Chen, Y. Improvement of electrochemical performance of nickel rich LiNi<sub>0.6</sub>Co<sub>0.2</sub>Mn<sub>0.2</sub>O<sub>2</sub> cathode active material by ultrathin TiO<sub>2</sub> coating. *Dalt. Trans.* **2016**, 45, 9669–9675, doi:10.1039/c6dt01764a.
2. Chen, X.; Ma, F.; Li, Y.; Liang, J.; Matthews, B.; Sokolowski, J.; Han, J.; Wu, G.; Lu, X.; Li, Q. Nitrogen-doped carbon coated LiNi<sub>0.6</sub>Co<sub>0.2</sub>Mn<sub>0.2</sub>O<sub>2</sub> cathode with enhanced electrochemical performance for Li-Ion batteries. *Electrochim. Acta* **2018**, 284, 526–533, doi:10.1016/j.electacta.2018.07.183.
3. Lu, X.; Zhang, N.; Jahn, M.; Pfleging, W. applied sciences Improved Capacity Retention of SiO<sub>2</sub>-Coated Lithium-Ion Batteries. **2019**, 2, 1–11, doi: 10.1016/j.jpowsour.2020.227907.
4. Laskar, M.R.; Jackson, D.H.K.; Xu, S.; Hamers, R.J.; Morgan, D.; Kuech, T.F. Atomic Layer Deposited MgO: A Lower Overpotential Coating for Li[Ni<sub>0.5</sub>Mn<sub>0.3</sub>Co<sub>0.2</sub>]O<sub>2</sub> Cathode. *ACS Appl. Mater. Interfaces* **2017**, 9, 11231–11239, doi:10.1021/acsami.6b16562.
5. Chen, Z.; Cao, K.; Zhu, H.; Gong, X.; Liu, Q.; Duan, J.; Li, L. Improved electrochemical performance of surface coated LiNi<sub>0.80</sub>Co<sub>0.15</sub>Al<sub>0.05</sub>O<sub>2</sub> with polypyrrole. *Front. Chem.* **2019**, 7, 1–10, doi:10.3389/fchem.2018.00648.
6. Bao, W.; Qian, G.; Zhao, L.; Yu, Y.; Su, L.; Cai, X.; Zhao, H.; Zuo, Y.; Zhang, Y.; Li, H.; et al. Simultaneous Enhancement of Interfacial Stability and Kinetics of Single-Crystal LiNi<sub>0.6</sub>Mn<sub>0.2</sub>Co<sub>0.2</sub>O<sub>2</sub> through Optimized Surface Coating and Doping. *Nano Lett.* **2020**, 20, 8832–8840, doi:10.1021/acs.nanolett.0c03778.
7. Herzog, M.J.; Gauquelin, N.; Esken, D.; Verbeeck, J.; Janek, J. Facile Dry Coating Method of High-Nickel Cathode Material by Nanostructured Fumed Alumina (Al<sub>2</sub>O<sub>3</sub>) Improving the Performance of Lithium-Ion Batteries. *Energy Technol.* **2021**, 9, doi:10.1002/ente.202100028.
8. Wang, L.; Mu, D.; Wu, B.; Yang, G.; Gai, L.; Liu, Q.; Fan, Y.; Peng, Y.; Wu, F. Enhanced electrochemical performance of Lithium Metasilicate-coated LiNi<sub>0.6</sub>Co<sub>0.2</sub>Mn<sub>0.2</sub>O<sub>2</sub> Ni-rich cathode for Li-ion batteries at high cutoff voltage. *Electrochim. Acta* **2016**, 222, 806–813, doi:10.1016/j.electacta.2016.11.041.
9. Zhao, Z.; Chen, S.; Mu, D.; Ma, R.; Li, C.; Wu, B.; Wu, F.; Cheng, K.; Xie, C. Understanding the

- surface decoration on primary particles of nickel-rich layered  $\text{LiNi}_{0.6}\text{Co}_{0.2}\text{Mn}_{0.2}\text{O}_2$  cathode material with lithium phosphate. *J. Power Sources* **2019**, 431, 84–92, doi:10.1016/j.jpowsour.2019.05.046.
10. Song, G.; Zhong, H.; Dai, Y.; Zhou, X.; Yang, J. WO<sub>3</sub> membrane-encapsulated layered  $\text{LiNi}_{0.6}\text{Co}_{0.2}\text{Mn}_{0.2}\text{O}_2$  cathode material for advanced Li-ion batteries. *Ceram. Int.* **2019**, 45, 6774–6781, doi:10.1016/j.ceramint.2018.12.169.
  11. Ding, Y.; Deng, B.; Wang, H.; Li, X.; Chen, T.; Yan, X.; Wan, Q.; Qu, M.; Peng, G. Improved electrochemical performances of  $\text{LiNi}_{0.6}\text{Co}_{0.2}\text{Mn}_{0.2}\text{O}_2$  cathode material by reducing lithium residues with the coating of Prussian blue. *J. Alloys Compd.* **2019**, 774, 451–460, doi:10.1016/j.jallcom.2018.09.286.
  12. Shim, J.-H.; Kim, Y.-M.; Park, M.; Kim, J.; Lee, S. Reduced Graphene Oxide-Wrapped Nickel-Rich Cathode Materials for Lithium Ion Batteries. *ACS Appl. Mater. Interfaces* **2017**, 9, 18720–18729, doi:10.1021/acsami.7b02654.
  13. Chen, Y.; Tang, S.; Deng, S.; Lei, T.; Li, Y.; Li, W.; Cao, G.; Zhu, J.; Zhang, J. Chemical coupling constructs amorphous silica modified  $\text{LiNi}_{0.6}\text{Co}_{0.2}\text{Mn}_{0.2}\text{O}_2$  cathode materials and its electrochemical performances. *J. Power Sources* **2019**, 431, 8–16, doi:10.1016/j.jpowsour.2019.05.042.
  14. Xu, Y. Di; Xiang, W.; Wu, Z.G.; Xu, C.L.; Li, Y.C.; Guo, X.D.; Lv, G.P.; Peng, X.; Zhong, B.H. Improving cycling performance and rate capability of Ni-rich  $\text{LiNi}_{0.8}\text{Co}_{0.1}\text{Mn}_{0.1}\text{O}_2$  cathode materials by  $\text{Li}_4\text{Ti}_5\text{O}_{12}$  coating. *Electrochim. Acta* **2018**, 268, 358–365, doi:10.1016/j.electacta.2018.02.049.
  15. Yang, H.; Du, K.; Hu, G.; Peng, Z.; Cao, Y.; Wu, K.; Lu, Y.; Qi, X.; Mu, K.; Wu, J. Graphene@TiO<sub>2</sub> co-modified  $\text{LiNi}_{0.6}\text{Co}_{0.2}\text{Mn}_{0.2}\text{O}_2$  cathode materials with enhanced electrochemical performance under harsh conditions. *Electrochim. Acta* **2018**, 289, 149–157, doi:10.1016/j.electacta.2018.08.089.
